# Supplementary material for: Online Fake News About Food: Self-Evaluation, Social Influence And The Stages Of Change Moderation
Source: Preprints.org preprint supplement (doi:10.20944/preprints202102.0342.v1), 2021-02-17
Supplement: Supplementary file 1 [file supplementary]

**Questionnaire**

**Gender**

- Male
- Female

**Year of birth**

|  |
| --- |

**Region of residence**

- Abruzzo
- Basilicata
- Calabria
- Campania
- Emilia Romagna
- Friuli Venezia Giulia
- Lazio
- Liguria
- Lombardia
- Marche
- Molise
- Piemonte
- Puglia
- Sardegna
- Sicilia
- Toscana
- Trentino Alto Adige
- Umbria
- Valle d'Aosta
- Veneto

**Residence municipality size**

- Up to 10000 inhabitants
- 10/30.000 inhabitants
- 30/100.000 inhabitants
- More than 100.000,
- I don’t know

**Employment**

- Employed
- Not employed
- Retired

**Level of education**

- No educational qualifications
- Elementary license
- Lower secondary school leaving certificate
- High school diploma
- Degree

**Are you the main household food purchaser?**

- Yes, just me
- Yes, with others
- No

**How interested are you in making your lifestyle healthier than it is now?**

- I'm not interested in changing my lifestyle at the moment
- I plan to make changes in my lifestyle in the next 6 months
- I plan to make changes in my lifestyle this month
- I recently started making changes in my lifestyle
- I believe I already have a healthy lifestyle

**In the last year have you believed in a piece of news about food read on Internet or on social networks that turned out to be a fake news (Fake News)?**

- Never
- Rarely
- Sometimes
- Often
- Always

**Indicate your degree of agreement with the following statements from 1 to 7 where:**

**(1 = Strongly disagree and 7=Strongly agree)**

|  | 1 Strongly disagree | 2 | 3 | 4 Neither agree or disagree | 5 | 6 | 7 Strongly agree |
| --- | --- | --- | --- | --- | --- | --- | --- |
| When buying products, I generally purchase those brands that I think others will approve of |  |  |  |  |  |  |  |
| It is important that others like the products and brands I buy. |  |  |  |  |  |  |  |
| If I have little experience with a product, I often ask my friends about the product. |  |  |  |  |  |  |  |
| I frequently gather information from friends or family about a product before I buy. |  |  |  |  |  |  |  |

**Indicate your degree of agreement with the following statements from 1 to 7 where:**

(1 = Strongly disagree, 2 = Disagree, 3 = Neither agree or disagree, 4 = Agree, 5 = Strongly agree)

|  | 1 Strongly disagree | 2 disagree | 3 Neither agree or disagree | 4 Agree | 5 Strongly agree |
| --- | --- | --- | --- | --- | --- |
| I'm sure I get the success I deserve in life |  |  |  |  |  |
| Sometimes I feel sad and upset |  |  |  |  |  |
| When I try, I generally succeed |  |  |  |  |  |
| Sometimes when I fail I feel like I'm worth nothing |  |  |  |  |  |
| I successfully complete my assignments |  |  |  |  |  |
| Sometimes, I feel like I'm not in control of my job |  |  |  |  |  |
| Overall, I am satisfied with myself |  |  |  |  |  |
| I am full of doubts about my competence |  |  |  |  |  |
| I determine what will happen in my life |  |  |  |  |  |
| I feel like I am not in control of my success in my career |  |  |  |  |  |
| I am able to deal with most of my problems |  |  |  |  |  |
| There are times when things seem rather depressing and hopeless to me |  |  |  |  |  |

**In which of these classes does your / your family's monthly net income fall?**

- Up to 600 euro
- 601-900 euro
- 901-1200 euro
- 1201-1500 euro
- 1501-1800 euro
- 1801-2550 euro
- 2551-3550 euro
- More then 3550 euro
- I prefer not to answer
